# Supplementary material
Source: publisher figshare collection journal article supplement (https://springernature.figshare.com/ndownloader/files/15598544)
Supplement: Supplementary file 1 [file 15598544]

## Sheet: (a) Known miRNA
Table S2. Target gene prediction for (a) identified known miRNAs and (b) putative novel miRNAs.
Supplementary Table 2 Target gene prediction for (a) identified known miRNAs and (b) putative novel miRNAs.
miRNA_Acc.	Target_Acc.	Target_Desc.	Expectation
miR156	GSMUA_Achr11T19580_001	Putative Squamosa promoter-binding-like protein 18	0
	GSMUA_Achr5T22630_001	Squamosa promoter-binding-like protein 12	1
	GSMUA_Achr8T23820_001	Hypothetical protein	1
	GSMUA_Achr10T02970_001	Putative Squamosa promoter-binding-like protein 12	1
	GSMUA_Achr10T23280_001	Putative Squamosa promoter-binding-like protein 12	1
	GSMUA_Achr3T27750_001	Putative Squamosa promoter-binding-like protein 12	1
	GSMUA_Achr3T05360_001	Putative Squamosa promoter-binding-like protein 12	1
	GSMUA_Achr9T14160_001	Putative Squamosa promoter-binding-like protein 12	1
	GSMUA_Achr6T36010_001	Putative Squamosa promoter-binding-like protein 12	1
	GSMUA_Achr5T21990_001	Putative Squamosa promoter-binding-like protein 12	1
	GSMUA_Achr9T23140_001	Putative Squamosa promoter-binding-like protein 12	1
	GSMUA_Achr5T25090_001	Putative Squamosa promoter-binding-like protein 18	1
	GSMUA_Achr6T22280_001	Putative Squamosa promoter-binding-like protein 17	1
	GSMUA_Achr2T06150_001	Putative Squamosa promoter-binding-like protein 16	1
	GSMUA_Achr3T11170_001	Putative Squamosa promoter-binding-like protein 17	1
	GSMUA_Achr9T29330_001	Putative OsSPL16 - SBP-box gene family member, expressed	1
	GSMUA_Achr9T01380_001	Putative OsSPL16 - SBP-box gene family member, expressed	1
	GSMUA_AchrUn_randomT08380_001	Putative Squamosa promoter-binding-like protein 18	1
	GSMUA_Achr6T06030_001	Putative uncharacterized protein	1
	GSMUA_Achr9T27660_001	Putative Squamosa promoter-binding-like protein 17	1
	GSMUA_Achr4T16050_001	Putative uncharacterized protein	1
	GSMUA_Achr4T01450_001	Whole genome shotgun sequence of line PN40024, scaffold_7.assembly12x (Fragment)	1
	GSMUA_AchrUn_randomT05850_001	Putative Squamosa promoter-binding-like protein 16	1
	GSMUA_Achr4T12470_001	Putative uncharacterized protein Sb04g004940	1
	GSMUA_AchrUn_randomT21900_001	Putative Squamosa promoter-binding-like protein 16	1
	GSMUA_Achr4T26940_001	Hypothetical protein	1
	GSMUA_Achr4T05720_001	Putative Squamosa promoter-binding-like protein 12	1
	GSMUA_Achr7T02020_001	Putative Squamosa promoter-binding-like protein 17	1
	GSMUA_Achr8T25550_001	Putative Squamosa promoter-binding-like protein 17	1
	GSMUA_Achr7T20510_001	Putative Squamosa promoter-binding-like protein 14	1
	GSMUA_Achr7T22940_001	Putative Squamosa promoter-binding-like protein 16	1
	GSMUA_Achr5T13440_001	Putative OsSPL7 - SBP-box gene family member, expressed	1
	GSMUA_Achr4T03880_001	Putative Squamosa promoter-binding-like protein 17	1
	GSMUA_Achr9T20220_001	Putative Squamosa promoter-binding-like protein 17	1
	GSMUA_Achr9T22260_001	Putative Promoter-binding protein SPL9	2
	GSMUA_Achr10T17120_001	U-box domain-containing protein 9	2.5
	GSMUA_Achr10T25660_001	Bet1-like protein At4g14600	3
	GSMUA_Achr1T10120_001	Hypothetical protein	3
	GSMUA_Achr6T32830_001	LIMR family protein At5g01460	3.5
	GSMUA_Achr5T16530_001	Callose synthase 5	3.5
	GSMUA_Achr7T09640_001	IQ calmodulin-binding motif domain containing protein, expressed	3.5
	GSMUA_Achr9T12920_001	Hypothetical protein	3.5
	GSMUA_Achr6T34660_001	expressed protein	3.5
	GSMUA_Achr6T13530_001	Putative 1,4-alpha-glucan-branching enzyme	3.5
	GSMUA_AchrUn_randomT14940_001	Putative Probable beta-D-xylosidase 2	3.5
	GSMUA_Achr10T24770_001	Putative Protein SCAI	3.5
	GSMUA_Achr7T04550_001	phosphatidate cytidylyltransferase family protein, putative, expressed	3.5
	GSMUA_Achr2T18380_001	SNF2 family N-terminal domain containing protein, expressed	3.5
	GSMUA_Achr10T27280_001	Putative Serine incorporator 3	3.5
	GSMUA_Achr9T19590_001	methyladenine glycosylase, putative, expressed	3.5
	GSMUA_Achr2T05070_001	methyladenine glycosylase, putative, expressed	3.5
	GSMUA_AchrUn_randomT10030_001	Histidine kinase 3	3.5
	GSMUA_AchrUn_randomT23020_001	timeless protein, expressed	3.5
	GSMUA_Achr8T24550_001	expressed protein	3.5
miR159	GSMUA_Achr1T01660_001	Putative Whole genome shotgun sequence of line PN40024, scaffold_21.assembly12x (Fragment)	2
	GSMUA_Achr10T29280_001	Putative Transcription factor GAMYB	2.5
	GSMUA_Achr7T21560_001	Putative Transcription factor GAMYB	2.5
	GSMUA_AchrUn_randomT15100_001	Putative Transcription factor GAMYB	2.5
	GSMUA_Achr1T17150_001	Putative Transcription factor GAMYB	2.5
	GSMUA_Achr9T12880_001	Putative Nuclear polyadenylated RNA-binding protein 4	2.5
	GSMUA_Achr9T24770_001	Putative Cysteine-rich receptor-like protein kinase 15	2.5
	GSMUA_Achr7T02510_001	Hypothetical protein	3
	GSMUA_Achr1T02000_001	transcription factor BTF3, putative, expressed	3
	GSMUA_Achr4T32650_001	Chorismate mutase, chloroplastic	3
	GSMUA_Achr7T26430_001	DUF1336 domain containing protein, expressed	3
	GSMUA_Achr6T16020_001	Calcium/calmodulin-dependent serine/threonine-protein kinase 1	3
	GSMUA_Achr6T23680_001	Calcium/calmodulin-dependent serine/threonine-protein kinase 1	3
	GSMUA_Achr5T16960_001	Putative Receptor protein kinase CLAVATA1	3
	GSMUA_Achr7T26430_001	DUF1336 domain containing protein, expressed	3.5
	GSMUA_Achr7T26430_001	DUF1336 domain containing protein, expressed	3.5
	GSMUA_Achr1T08750_001	Hypothetical protein	3.5
	GSMUA_Achr3T28610_001	Putative Probably inactive leucine-rich repeat receptor-like protein kinase At2g25790	3.5
	GSMUA_Achr3T28550_001	Putative Probable LRR receptor-like serine/threonine-protein kinase At4g08850	3.5
	GSMUA_Achr4T05170_001	Putative Two-component response regulator-like PRR95	3.5
	GSMUA_Achr3T28560_001	Putative LRR receptor-like serine/threonine-protein kinase GSO1	3.5
	GSMUA_Achr5T28600_001	Putative expressed protein	3.5
	GSMUA_Achr6T16220_001	Putative Heparan-alpha-glucosaminide N-acetyltransferase	3.5
	GSMUA_Achr10T12640_001	Calcium/calmodulin-dependent serine/threonine-protein kinase 1	3.5
	GSMUA_Achr8T33810_001	Hypothetical protein	3.5
	GSMUA_Achr7T26460_001	Putative Pentatricopeptide repeat-containing protein At2g13600	3.5
	GSMUA_Achr2T15850_001	Coatomer subunit beta'-1	3.5
	GSMUA_Achr9T06640_001	Putative expressed protein	3.5
miR166-3p	GSMUA_Achr8T02960_001	Homeobox-leucine zipper protein HOX32	0.5
	GSMUA_Achr2T13050_001	Homeobox-leucine zipper protein HOX32	1
	GSMUA_Achr5T18530_001	Homeobox-leucine zipper protein HOX9	1
	GSMUA_Achr8T20090_001	Homeobox-leucine zipper protein ATHB-15	1
	GSMUA_Achr4T31660_001	Homeobox-leucine zipper protein HOX32	1
	GSMUA_Achr7T01060_001	Homeobox-leucine zipper protein HOX32	1
	GSMUA_Achr5T02420_001	Homeobox-leucine zipper protein HOX32	1
	GSMUA_Achr4T28360_001	Homeobox-leucine zipper protein HOX32	1
	GSMUA_Achr8T02070_001	Putative 2-oxoglutarate dehydrogenase, mitochondrial	2.5
	GSMUA_Achr5T06550_001	Homeobox-leucine zipper protein ATHB-15	3
	GSMUA_Achr4T17130_001	Zeta-carotene desaturase, chloroplastic/chromoplastic	3
	GSMUA_Achr1T20180_001	expressed protein	3.5
	GSMUA_Achr5T00550_001	BTB/POZ domain-containing protein At1g30440	3.5
	GSMUA_Achr1T23410_001	Putative H-BTB7 - Bric-a-Brac, Tramtrack, Broad Complex BTB domain with H family conserved sequence, expressed	3.5
	GSMUA_Achr3T17930_001	LIMR family protein At5g01460	3.5
	GSMUA_Achr5T06020_001	Putative Pentatricopeptide repeat-containing protein At4g32430, mitochondrial	3.5
	GSMUA_Achr3T25810_001	Pentatricopeptide repeat-containing protein At3g49730	3.5
	GSMUA_Achr3T02850_001	Putative Transcriptional corepressor SEUSS	3.5
	GSMUA_Achr2T14650_001	Phosphatidylinositol-4-phosphate 5-kinase 1	3.5
miR167	GSMUA_Achr2T17210_001	Cytochrome c biogenesis protein CCS1, chloroplastic	2.5
	GSMUA_Achr10T29410_001	Putative expressed protein	3
	GSMUA_Achr2T13250_001	zinc finger, C3HC4 type domain containing protein, expressed	3
	GSMUA_AchrUn_randomT06470_001	Hypothetical protein	3.5
	GSMUA_Achr8T13620_001	Auxin response factor 12	3.5
	GSMUA_Achr4T25960_001	Auxin response factor 12	3.5
	GSMUA_Achr11T01610_001	Auxin response factor 12	3.5
	GSMUA_Achr5T26580_001	Auxin response factor 6	3.5
	GSMUA_Achr3T23290_001	Auxin response factor 17	3.5
	GSMUA_Achr5T02450_001	Auxin response factor 6	3.5
	GSMUA_Achr11T18520_001	Auxin response factor 17	3.5
	GSMUA_Achr6T19850_001	Auxin response factor 17	3.5
	GSMUA_Achr5T00590_001	Auxin response factor 17	3.5
	GSMUA_Achr11T25770_001	Auxin response factor 6	3.5
	GSMUA_Achr4T20110_001	Probable plastid-lipid-associated protein 2, chloroplastic	3.5
	GSMUA_Achr5T05020_001	Putative U-box domain-containing protein 52	3.5
	GSMUA_Achr3T13250_001	Putative chloride channel-like protein CLC-g	3.5
	GSMUA_Achr5T26800_001	Copper-transporting ATPase RAN1	3.5
	GSMUA_Achr6T31610_001	Putative Receptor-like protein kinase HAIKU2	3.5
	GSMUA_Achr4T28110_001	zinc finger, C3HC4 type domain containing protein, expressed	3.5
	GSMUA_Achr1T14310_001	expressed protein	3.5
	GSMUA_Achr9T12140_001	nucleoside transporter, putative, expressed	3.5
miR319	GSMUA_Achr10T29280_001	Putative Transcription factor GAMYB	1.5
	GSMUA_Achr7T21560_001	Putative Transcription factor GAMYB	1.5
	GSMUA_AchrUn_randomT15100_001	Putative Transcription factor GAMYB	1.5
	GSMUA_Achr1T17150_001	Putative Transcription factor GAMYB	1.5
	GSMUA_Achr9T12880_001	Putative Nuclear polyadenylated RNA-binding protein 4	2
	GSMUA_Achr9T24770_001	Putative Cysteine-rich receptor-like protein kinase 15	2
	GSMUA_Achr7T02510_001	Hypothetical protein	2.5
	GSMUA_Achr2T12990_001	Putative Transcription factor PCF6	2.5
	GSMUA_Achr4T31520_001	Putative Transcription factor PCF6	2.5
	GSMUA_Achr7T01160_001	Putative Transcription factor PCF6	2.5
	GSMUA_Achr4T22960_001	Putative Transcription factor PCF6	2.5
	GSMUA_Achr5T02530_001	Putative Transcription factor PCF6	2.5
	GSMUA_Achr7T00280_001	Hypothetical protein	3
	GSMUA_Achr2T13930_001	Hypothetical protein	3
	GSMUA_Achr4T27730_001	Hypothetical protein	3
	GSMUA_Achr4T23690_001	Hypothetical protein	3
	GSMUA_Achr6T14430_001	TCP family transcription factor, putative, expressed	3
	GSMUA_Achr11T23110_001	Putative GATA transcription factor 26	3
	GSMUA_Achr8T19990_001	Predicted protein	3
	GSMUA_Achr10T01020_001	Predicted protein	3
	GSMUA_Achr3T03540_001	Putative TCP1 protein	3
	GSMUA_Achr5T06660_001	Putative Transcription factor TCP4	3
	GSMUA_Achr5T12840_001	Mitochondrial import inner membrane translocase subunit Tim13	3.5
	GSMUA_Achr1T00780_001	Mitochondrial import inner membrane translocase subunit Tim13	3.5
	GSMUA_Achr5T29140_001	Predicted protein	3.5
	GSMUA_Achr6T00080_001	Phytochrome C	3.5
	GSMUA_Achr1T01660_001	Putative Whole genome shotgun sequence of line PN40024, scaffold_21.assembly12x (Fragment)	3.5
	GSMUA_Achr4T22500_001	DNA (cytosine-5)-methyltransferase 1B	3.5
	GSMUA_Achr7T13980_001	Putative Transcription factor TCP3	3.5
	GSMUA_Achr3T06000_001	Putative U-box domain-containing protein 40	3.5
	GSMUA_Achr7T15470_001	Pentatricopeptide repeat-containing protein At5g02830, chloroplastic	3.5
	GSMUA_Achr10T27590_001	Putative Probable LRR receptor-like serine/threonine-protein kinase At1g05700	3.5
	GSMUA_Achr3T31370_001	TCP family transcription factor, putative, expressed	3.5
	GSMUA_Achr10T01680_001	Putative Zinc finger CCCH domain-containing protein 23	3.5
	GSMUA_Achr10T06650_001	ABC transporter F family member 1	3.5
miR396	GSMUA_Achr7T00440_001	DNA (cytosine-5)-methyltransferase 1B	1.5
	GSMUA_Achr10T18020_001	Putative Protein sel-1 homolog 2	2
	GSMUA_Achr3T06800_001	MADS-box transcription factor 22	2.5
	GSMUA_Achr7T12140_001	Uncharacterized protein At5g12080	2.5
	GSMUA_Achr10T19000_001	Putative Acetyl-CoA carboxylase	2.5
	GSMUA_Achr8T03710_001	Putative PAP-specific phosphatase, mitochondrial	2.5
	GSMUA_Achr8T07650_001	Putative uncharacterized protein	3
	GSMUA_Achr8T30640_001	Putative Whole genome shotgun sequence of line PN40024, scaffold_2.assembly12x (Fragment)	3
	GSMUA_Achr6T01270_001	growth-regulating factor, putative, expressed	3
	GSMUA_Achr10T06370_001	growth-regulating factor, putative, expressed	3
	GSMUA_AchrUn_randomT15490_001	Predicted protein	3
	GSMUA_Achr1T23840_001	growth-regulating factor, putative, expressed	3
	GSMUA_Achr1T21940_001	Putative Whole genome shotgun sequence of line PN40024, scaffold_16.assembly12x (Fragment)	3
	GSMUA_Achr3T22790_001	Putative Whole genome shotgun sequence of line PN40024, scaffold_7.assembly12x (Fragment)	3
	GSMUA_AchrUn_randomT04320_001	growth-regulating factor, putative, expressed	3
	GSMUA_Achr1T27000_001	growth-regulating factor, putative, expressed	3
	GSMUA_Achr2T04650_001	growth-regulating factor, putative, expressed	3
	GSMUA_Achr3T15140_001	growth regulating factor protein, putative, expressed	3
	GSMUA_Achr8T04970_001	growth-regulating factor, putative, expressed	3
	GSMUA_Achr7T27480_001	growth-regulating factor, putative, expressed	3
	GSMUA_Achr8T26530_001	metalloendopeptidase/ metallopeptidase/ zinc ion binding protein, putative, expressed	3
	GSMUA_Achr3T03930_001	EF hand family protein, putative, expressed	3
	GSMUA_Achr6T24050_001	Putative UPF0553 protein	3
	GSMUA_Achr1T02370_001	heavy metal-associated domain containing protein, expressed	3
	GSMUA_Achr4T25770_001	heavy metal-associated domain containing protein, expressed	3
	GSMUA_Achr4T09680_001	CAAX amino terminal protease family protein, putative, expressed	3
	GSMUA_Achr4T14720_001	RFC1 - Putative clamp loader of PCNA, replication factor C subunit 1, expressed	3
	GSMUA_AchrUn_randomT16840_001	Peroxidase 64	3.5
	GSMUA_Achr8T07080_001	Putative Pentatricopeptide repeat-containing protein At2g13600	3.5
	GSMUA_Achr8T13690_001	glutaredoxin domain containing protein, putative, expressed	3.5
	GSMUA_Achr6T30550_001	bZIP transcription factor TRAB1	3.5
	GSMUA_Achr8T18820_001	Glutamyl-tRNA reductase 1, chloroplastic	3.5
	GSMUA_Achr4T11940_001	Luminal-binding protein 4	3.5
	GSMUA_Achr3T19990_001	Putative uncharacterized protein (Fragment)	3.5
	GSMUA_Achr10T25890_001	GAGA-binding protein, putative	3.5
	GSMUA_Achr4T27780_001	Putative Whole genome shotgun sequence of line PN40024, scaffold_3.assembly12x (Fragment)	3.5
	GSMUA_Achr1T06470_001	Putative expressed protein	3.5
	GSMUA_Achr5T05600_001	DUF617 domain containing protein, expressed	3.5
	GSMUA_Achr1T19500_001	Putative Jasmonate O-methyltransferase	3.5
	GSMUA_Achr10T10520_001	expressed protein	3.5
	GSMUA_Achr6T35300_001	Hypothetical protein	3.5
	GSMUA_Achr4T17680_001	nodulin, putative, expressed	3.5
	GSMUA_Achr5T11650_001	Putative Probable E3 ubiquitin-protein ligase HERC2	3.5
	GSMUA_Achr4T33120_001	Putative Remorin	3.5
	GSMUA_Achr7T06070_001	Putative DNA-directed RNA polymerases I and III subunit rpac1	3.5
	GSMUA_Achr9T27090_001	Putative fucosyltransferase 10	3.5
	GSMUA_Achr3T12080_001	Indole-3-glycerol phosphate synthase, chloroplastic	3.5
	GSMUA_AchrUn_randomT10160_001	Putative Pentatricopeptide repeat-containing protein At4g16835, mitochondrial	3.5
	GSMUA_Achr9T13580_001	Protein SGT1 homolog At5g65490	3.5
	GSMUA_Achr6T01570_001	40S ribosomal protein S13	3.5
	GSMUA_Achr10T20700_001	Putative Omega-hydroxypalmitate O-feruloyl transferase	3.5
	GSMUA_Achr6T01240_001	src homology-3 domain protein 3, putative, expressed	3.5
	GSMUA_Achr9T27370_001	Putative Replication protein A 70 kDa DNA-binding subunit	3.5
	GSMUA_Achr7T22660_001	Putative V-type proton ATPase 116 kDa subunit a isoform 1	3.5
	GSMUA_Achr9T23740_001	Putative Katanin p80 WD40 repeat-containing subunit B1 homolog 1	3.5
	GSMUA_Achr11T22740_001	Putative expressed protein	3.5
	GSMUA_Achr7T23270_001	SNF2 family N-terminal domain containing protein, expressed	3.5
	GSMUA_Achr10T09260_001	Putative Whole genome shotgun sequence of line PN40024, scaffold_90.assembly12x (Fragment)	3.5
	GSMUA_Achr1T01720_001	Putative Pentatricopeptide repeat-containing protein At5g62370	3.5
	GSMUA_Achr5T16860_001	Putative Late embryogenesis abundant protein, group 3	3.5
	GSMUA_Achr2T13090_001	DNA repair protein recA homolog 1, chloroplastic	3.5
	GSMUA_Achr10T24020_001	co-chaperone GrpE protein, putative, expressed	3.5
	GSMUA_Achr7T11810_001	Putative Patatin group A-3	3.5
miR535	GSMUA_Achr10T28970_001	Hypothetical protein	2
	GSMUA_Achr6T27560_001	Hypothetical protein	2.5
	GSMUA_Achr11T19170_001	Hypothetical protein	2.5
	GSMUA_Achr3T06140_001	Potassium transporter 6	3
	GSMUA_Achr10T03540_001	Sodium/hydrogen exchanger 6	3
	GSMUA_AchrUn_randomT23140_001	expressed protein	3
	GSMUA_Achr2T11010_001	MYB family transcription factor, putative, expressed	3.5
	GSMUA_Achr3T30090_001	Putative Pentatricopeptide repeat-containing protein At1g25360	3.5
	GSMUA_Achr4T17510_001	Hypothetical protein	3.5
	GSMUA_Achr5T09120_001	retrotransposon protein, putative, unclassified	3.5
miR408-3p	GSMUA_Achr10T18040_001	Basic blue protein	1.5
	GSMUA_Achr2T11880_001	Hypothetical protein	2
	GSMUA_Achr8T23110_001	Chemocyanin	2
	GSMUA_Achr2T06770_001	transcription factor, putative, expressed	2
	GSMUA_Achr6T17010_001	Chemocyanin	2
	GSMUA_Achr10T11270_001	Basic blue protein	2
	GSMUA_Achr6T11190_001	Basic blue protein	2
	GSMUA_Achr3T09960_001	Laccase-3	2.5
	GSMUA_Achr6T07680_001	Basic blue protein	2.5
	GSMUA_Achr1T14040_001	Putative Predicted protein	2.5
	GSMUA_Achr4T07190_001	Putative Scarecrow-like protein 15	3
	GSMUA_Achr1T14770_001	Importin subunit alpha-1b	3
	GSMUA_Achr1T04980_001	Probable LRR receptor-like serine/threonine-protein kinase At1g53430	3
	GSMUA_Achr1T14230_001	metalloendopeptidase/ metallopeptidase/ zinc ion binding protein, putative, expressed	3
	GSMUA_Achr9T18460_001	S-adenosylmethionine decarboxylase proenzyme	3
	GSMUA_Achr6T16820_001	expressed protein	3
	GSMUA_Achr10T09730_001	Hypothetical protein	3
	GSMUA_Achr8T07630_001	AT-GTL1, putative, expressed	3
	GSMUA_Achr1T19830_001	Putative Cation/H(+) antiporter 15	3
	GSMUA_Achr1T19830_001	Putative Cation/H(+) antiporter 15	3
	GSMUA_Achr3T11430_001	Putative Cation/H(+) antiporter 15	3
	GSMUA_Achr3T11440_001	Putative Cation/H(+) antiporter 15	3
	GSMUA_Achr3T11420_001	Putative Cation/H(+) antiporter 15	3
	GSMUA_Achr3T18420_001	F-box protein At2g32560	3
	GSMUA_Achr4T08180_001	Putative O-acyltransferase WSD1	3.5
	GSMUA_Achr6T35680_001	Laccase-3	3.5
	GSMUA_Achr9T17900_001	Laccase-3	3.5
	GSMUA_Achr5T12560_001	transferase family protein, putative, expressed	3.5
	GSMUA_Achr10T10440_001	Putative uncharacterized protein	3.5
	GSMUA_Achr6T16010_001	F-box protein At2g32560	3.5
	GSMUA_AchrUn_randomT14530_001	Laccase-3	3.5
	GSMUA_Achr10T00890_001	Glucan endo-1,3-beta-glucosidase	3.5
	GSMUA_Achr2T00830_001	SH2 motif, putative, expressed	3.5
	GSMUA_Achr9T00190_001	Putative Receptor protein kinase CLAVATA1	3.5
	GSMUA_Achr3T00600_001	transposon protein, putative, unclassified, expressed	3.5
	GSMUA_Achr4T25120_001	Probable pectate lyase 12	3.5
	GSMUA_Achr6T21040_001	FHA domain containing protein, putative, expressed	3.5
	GSMUA_Achr7T12420_001	integral membrane protein, putative, expressed	3.5
	GSMUA_Achr9T19300_001	Putative 50S ribosomal protein L7/L12	3.5
	GSMUA_Achr7T18880_001	Zeaxanthin epoxidase, chloroplastic	3.5
	GSMUA_Achr9T04810_001	Putative Vicilin-like antimicrobial peptides 2-2	3.5
	GSMUA_Achr3T15100_001	Putative Wall-associated receptor kinase-like 14	3.5
	GSMUA_Achr11T08280_001	Putative Dihydroflavonol-4-reductase	3.5
	GSMUA_Achr1T18560_001	armadillo/beta-catenin repeat family protein, putative, expressed	3.5
	GSMUA_Achr8T02530_001	Putative Lectin-domain containing receptor kinase A4.3	3.5
	GSMUA_Achr2T19160_001	avr9/Cf-9 rapidly elicited protein, putative, expressed	3.5
	GSMUA_Achr11T02760_001	Putative expressed protein	3.5
	GSMUA_Achr2T03620_001	Cytokinin riboside 5'-monophosphate phosphoribohydrolase LOG5	3.5

## Sheet: (b) Novel miRNA
miRNA_Acc.	Target_Acc.	Target_Desc.	Expectation
chr03_8720	GSMUA_Achr5T07170_001	Cation/H(+) antiporter 20	1.5
chr04_11709	GSMUA_Achr7T07330_001	Protein phosphatase 2C 70	2
chr04_12269	GSMUA_AchrUn_randomT27770_001	Putative disease resistance protein At3g14460	2
chr04_12269	GSMUA_Achr3T22330_001	Putative NBS-type resistance protein RGC5	2
chr04_9659	GSMUA_Achr2T07170_001	Hypothetical protein	2
chr04_9659	GSMUA_Achr4T26530_001	Hypothetical protein	2
chr06_18780	GSMUA_Achr4T18390_001	Hypothetical protein	2
chr10_32282	GSMUA_Achr6T27560_001	Hypothetical protein	2
chr02_4810	GSMUA_AchrUn_randomT00570_001	UPF0468 protein C16orf80 homolog	2.5
chr03_7051	GSMUA_Achr2T03610_001	Putative Pollen signalling protein with adenylyl cyclase activity (Fragment)	2.5
chr03_7051	GSMUA_Achr2T14330_001	Putative Polygalacturonase At1g48100	2.5
chr03_7051	GSMUA_Achr8T04200_001	lipase, putative, expressed	2.5
chr03_8720	GSMUA_AchrUn_randomT19970_001	Hypothetical protein	2.5
chr03_8720	GSMUA_Achr5T19070_001	Putative DUF246 domain-containing protein At1g04910	2.5
chr04_10750	GSMUA_Achr10T21730_001	Hypothetical protein	2.5
chr04_12269	GSMUA_Achr8T25220_001	Putative Transcription factor MYB44	2.5
chr04_12269	GSMUA_Achr7T25470_001	ESP1, putative, expressed	2.5
chr04_12269	GSMUA_Achr7T25470_001	ESP1, putative, expressed	2.5
chr04_12269	GSMUA_AchrUn_randomT28170_001	Hypothetical protein	2.5
chr04_12269	GSMUA_Achr8T30090_001	Putative cyclic nucleotide-gated ion channel 18	2.5
chr04_12269	GSMUA_Achr2T19770_001	Putative Exportin-2	2.5
chr04_12305	GSMUA_Achr10T24700_001	Hypothetical protein	2.5
chr04_9659	GSMUA_Achr10T18850_001	Sucrose transport protein SUT1	2.5
chr04_9659	GSMUA_Achr4T20060_001	Putative multidrug resistance protein	2.5
chr04_9659	GSMUA_Achr8T07370_001	Formin-like protein 5	2.5
chr04_9659	GSMUA_Achr5T23140_001	plant viral response family protein, putative, expressed	2.5
chr04_9659	GSMUA_Achr4T26500_001	Cellulose synthase A catalytic subunit 9 [UDP-forming]	2.5
chr06_16110	GSMUA_Achr10T16310_001	expressed protein	2.5
chr06_16110	GSMUA_Achr4T25050_001	flavin monooxygenase, putative, expressed	2.5
chr06_16110	GSMUA_Achr6T24500_001	Putative Multidrug and toxin extrusion protein 1	2.5
chr07_21163	GSMUA_Achr6T02040_001	Hypothetical protein	2.5
chr09_27226	GSMUA_Achr7T08510_001	Pleiotropic drug resistance protein 6	2.5
chr09_28952	GSMUA_Achr6T32050_001	NBS-LRR class resistance protein (Fragment)	2.5
chr09_28952	GSMUA_Achr6T29800_001	Putative Disease resistance protein RPM1	2.5
chr10_29470	GSMUA_Achr5T22320_001	Protein cornichon homolog 1	2.5
chr10_29470	GSMUA_Achr4T02800_001	Putative OsWRKY11 - Superfamily of TFs having WRKY and zinc finger domains, expressed	2.5
chr10_29470	GSMUA_Achr3T05770_001	Pectinesterase 3	2.5
chr10_29470	GSMUA_Achr2T02190_001	expressed protein	2.5
chr10_29470	GSMUA_AchrUn_randomT00330_001	Probable exocyst complex component 6	2.5
chr10_29470	GSMUA_Achr8T03665_001	NBS-LRR class resistance protein (Fragment)	2.5
chr10_32282	GSMUA_Achr11T24560_001	Hypothetical protein	2.5
chr11_33768	GSMUA_Achr6T09780_001	Putative expressed protein	2.5
chr11_33768	GSMUA_Achr10T01000_001	Hypothetical protein	2.5
chr11_33768	GSMUA_Achr8T14680_001	Probable xyloglucan endotransglucosylase/hydrolase protein 30	2.5
mito6_37293	GSMUA_AchrUn_randomT14920_001	Calcium-transporting ATPase, endoplasmic reticulum-type	2.5
mito6_37293	GSMUA_Achr3T20630_001	Putative Probable inactive receptor kinase At5g58300	2.5
mito6_37293	GSMUA_Achr6T28170_001	protein kinase domain containing protein, expressed	2.5
mito6_37293	GSMUA_Achr1T23660_001	Putative Cation transporter HKT1	2.5
chr02_4810	GSMUA_Achr3T27700_001	myb-like DNA-binding domain containing protein, putative, expressed	3
chr02_4810	GSMUA_Achr11T19480_001	expressed protein	3
chr03_7051	GSMUA_Achr5T06880_001	retrotransposon protein, putative, unclassified, expressed	3
chr03_7051	GSMUA_Achr1T15780_001	Chaperone protein dnaJ	3
chr03_7051	GSMUA_Achr5T11980_001	Putative Disease resistance protein RPS2	3
chr03_7051	GSMUA_AchrUn_randomT09840_001	Putative E3 ubiquitin-protein ligase KEG	3
chr03_7051	GSMUA_Achr4T20740_001	serine/threonine-protein kinase HT1, putative, expressed	3
chr03_7051	GSMUA_Achr9T18270_001	expressed protein	3
chr03_7051	GSMUA_Achr3T25110_001	lipase, putative, expressed	3
chr03_7882	GSMUA_Achr3T27440_001	PAP/25A associated domain containing protein, putative, expressed	3
chr03_7882	GSMUA_Achr4T09200_001	protein of unknown function, DUF618 domain containing protein, expressed	3
chr03_8720	GSMUA_Achr6T33330_001	Cation/H(+) antiporter 20	3
chr03_8720	GSMUA_Achr8T07160_001	PLA IIIA/PLP7, putative, expressed	3
chr03_8720	GSMUA_Achr7T03170_001	Soluble inorganic pyrophosphatase	3
chr03_8720	GSMUA_Achr6T10860_001	1-phosphatidylinositol-4-phosphate 5-kinase/ zinc ion binding protein, putative, expressed	3
chr03_8720	GSMUA_Achr4T04960_001	Putative Whole genome shotgun sequence of line PN40024, scaffold_154.assembly12x (Fragment)	3
chr03_8720	GSMUA_Achr7T10350_001	Putative Equilibrative nucleoside transporter 4	3
chr03_8720	GSMUA_Achr3T15660_001	Putative Pathogenesis-related protein 1	3
chr03_8720	GSMUA_AchrUn_randomT14620_001	Serine carboxypeptidase-like 27	3
chr03_8720	GSMUA_Achr8T21070_001	Serine carboxypeptidase-like 27	3
chr03_8720	GSMUA_Achr5T05680_001	expressed protein	3
chr03_8720	GSMUA_Achr5T26630_001	PLA IIIA/PLP7, putative, expressed	3
chr03_8720	GSMUA_Achr6T03420_001	AT hook motif domain containing protein, expressed	3
chr03_8720	GSMUA_Achr1T10870_001	RNA recognition motif containing protein, putative, expressed	3
chr03_8720	GSMUA_Achr9T25670_001	Putative tesmin/TSO1-like CXC domain containing protein, expressed	3
chr04_10750	GSMUA_Achr8T03650_001	Putative Cysteine-rich receptor-like protein kinase 25	3
chr04_10750	GSMUA_Achr8T01220_001	Putative Cation/H(+) antiporter 15	3
chr04_10750	GSMUA_Achr1T20860_001	Hypothetical protein	3
chr04_12269	GSMUA_Achr9T22590_001	Putative Probable LRR receptor-like serine/threonine-protein kinase At4g37250	3
chr04_12269	GSMUA_Achr1T10240_001	Probable E3 ubiquitin-protein ligase XBOS32	3
chr04_12305	GSMUA_Achr8T31640_001	Chaperone protein dnaJ 15	3
chr04_12305	GSMUA_Achr11T14590_001	Serine/threonine-protein kinase CTR1	3
chr04_12305	GSMUA_Achr2T21230_001	Beta-galactosidase 15	3
chr04_12305	GSMUA_Achr5T18930_001	Hypothetical protein	3
chr04_9659	GSMUA_Achr4T15570_001	harpin-induced protein 1 domain containing protein, expressed	3
chr04_9659	GSMUA_Achr7T18580_001	plant viral response family protein, putative, expressed	3
chr04_9659	GSMUA_Achr5T00540_001	zinc finger, C3HC4 type, domain containing protein, expressed	3
chr04_9659	GSMUA_Achr5T16570_001	zinc finger family protein, putative, expressed	3
chr06_16110	GSMUA_Achr6T31610_001	Putative Receptor-like protein kinase HAIKU2	3
chr06_16110	GSMUA_Achr11T03090_001	Fasciclin-like arabinogalactan protein 8	3
chr06_16110	GSMUA_Achr11T20800_001	Putative expressed protein	3
chr06_18780	GSMUA_Achr9T11970_001	Putative cysteine-rich receptor-like protein kinase 23	3
chr06_18780	GSMUA_Achr5T18230_001	Hypothetical protein	3
chr07_21163	GSMUA_Achr3T19940_001	expressed protein	3
chr07_21163	GSMUA_Achr3T05290_001	UPF0136 membrane protein At2g26240	3
chr07_21163	GSMUA_AchrUn_randomT19930_001	Hypothetical protein	3
chr07_21163	GSMUA_Achr2T22670_001	expressed protein	3
chr08_22829	GSMUA_Achr1T20570_001	60S ribosomal protein L11	3
chr08_22829	GSMUA_Achr3T06340_001	Putative Probable GMP synthase [glutamine-hydrolyzing]	3
chr08_24907	GSMUA_Achr4T10900_001	Putative BTB/POZ domain-containing protein At1g30440	3
chr08_24907	GSMUA_Achr3T17740_001	Calcium-transporting ATPase 1, endoplasmic reticulum-type	3
chr08_24907	GSMUA_Achr8T08330_001	4,5-DOPA dioxygenase extradiol-like protein	3
chr08_24907	GSMUA_Achr6T34380_001	Putative Monoglyceride lipase	3
chr08_24907	GSMUA_Achr3T17020_001	3-oxoacyl-[acyl-carrier-protein] reductase, chloroplastic	3
chr08_24907	GSMUA_Achr3T23040_001	formin-like protein 3 precursor, putative, expressed	3
chr08_24907	GSMUA_Achr3T26770_001	ATPase ASNA1 homolog	3
chr09_27226	GSMUA_Achr11T18550_001	Probable polyamine oxidase 2	3
chr09_27226	GSMUA_Achr9T22100_001	Putative LRR receptor-like serine/threonine-protein kinase FLS2	3
chr09_27356	GSMUA_Achr7T14510_001	phosphatidylinositol 3- and 4-kinase family protein, putative, expressed	3
chr09_27356	GSMUA_Achr3T01160_001	40S ribosomal protein S23	3
chr09_28952	GSMUA_Achr7T21400_001	disease resistance protein RGA2, putative, expressed	3
chr09_28952	GSMUA_AchrUn_randomT01660_001	Putative Serine/threonine protein phosphatase 2A 59 kDa regulatory subunit B' gamma isoform	3
chr09_28952	GSMUA_Achr4T31030_001	Putative disease resistance protein RGA3	3
chr10_29470	GSMUA_Achr3T04750_001	Putative expressed protein	3
chr10_29470	GSMUA_AchrUn_randomT05530_001	starch binding domain containing protein, putative, expressed	3
chr10_29470	GSMUA_Achr6T05660_001	Probable methyltransferase PMT28	3
chr10_29470	GSMUA_Achr2T18630_001	Putative CPuORF23 - conserved peptide uORF-containing transcript, expressed	3
chr10_29470	GSMUA_Achr6T20500_001	Putative Pentatricopeptide repeat-containing protein At3g49170, chloroplastic	3
chr10_29470	GSMUA_Achr3T14640_001	Putative Cytochrome P450 71A2	3
chr10_29470	GSMUA_Achr6T03300_001	calmodulin binding protein, putative, expressed	3
chr10_29470	GSMUA_AchrUn_randomT10030_001	Histidine kinase 3	3
chr10_29470	GSMUA_Achr5T17530_001	Putative DnaJ homolog subfamily C member 7	3
chr10_32282	GSMUA_Achr4T31560_001	nucleolar protein NOP5, putative, expressed	3
chr10_32282	GSMUA_Achr8T15920_001	Arogenate dehydratase/prephenate dehydratase 6, chloroplastic	3
chr10_32282	GSMUA_AchrUn_randomT28900_001	Caffeic acid 3-O-methyltransferase	3
chr10_32282	GSMUA_AchrUn_randomT28580_001	Caffeic acid 3-O-methyltransferase	3
chr10_32282	GSMUA_Achr11T09900_001	Putative Bifunctional dihydroflavonol 4-reductase/flavanone 4-reductase	3
chr10_32282	GSMUA_Achr10T10530_001	deoxynucleoside kinase family, putative, expressed	3
chr10_32282	GSMUA_Achr4T16710_001	Putative Cation/H(+) antiporter 15	3
chr10_32282	GSMUA_Achr1T24770_001	Putative DNA primase small subunit	3
chr10_32282	GSMUA_Achr10T30900_001	Serrate RNA effector molecule	3
chr10_32282	GSMUA_Achr9T07290_001	DNA repair protein RAD50	3
mito6_37293	GSMUA_Achr4T00260_001	Putative Auxin-induced protein 5NG4	3
mito6_37293	GSMUA_Achr3T07960_001	Putative Myosin head domain containing protein, expressed	3
mito6_37293	GSMUA_Achr1T27090_001	adenylyl cyclase-associated protein, putative, expressed	3
mito6_37293	GSMUA_Achr3T14910_001	WD domain containing protein, putative, expressed	3
mito6_37293	GSMUA_Achr9T18790_001	Putative Probable LRR receptor-like serine/threonine-protein kinase At4g08850	3
mito6_37293	GSMUA_Achr2T16960_001	zinc finger family protein, putative, expressed	3
mito6_37293	GSMUA_AchrUn_randomT25700_001	Hypothetical protein	3
mito6_37293	GSMUA_Achr3T21870_001	Hypothetical protein	3
chr02_4810	GSMUA_Achr1T07410_001	Putative Aspartic proteinase-like protein 1	3.5
chr02_4810	GSMUA_Achr10T14870_001	Putative Glucan endo-1,3-beta-glucosidase 9	3.5
chr02_4810	GSMUA_Achr1T04420_001	1-aminocyclopropane-1-carboxylate synthase CMA101	3.5
chr02_4810	GSMUA_Achr7T07570_001	Putative Probable inactive receptor kinase At2g26730	3.5
chr02_4810	GSMUA_Achr3T20890_001	Ser/Thr receptor-like kinase, putative, expressed	3.5
chr02_4810	GSMUA_Achr6T10400_001	Ras-related protein RABH1B	3.5
chr02_4810	GSMUA_Achr3T20920_001	Putative Probable ATP-dependent RNA helicase DHX36	3.5
chr02_4810	GSMUA_Achr4T07530_001	ATP-dependent RNA helicase DHX36, putative, expressed	3.5
chr03_7051	GSMUA_Achr10T12050_001	Putative Sex determination protein tasselseed-2	3.5
chr03_7051	GSMUA_Achr10T18740_001	Hypothetical protein	3.5
chr03_7051	GSMUA_Achr1T03510_001	Ammonium transporter 1 member 1	3.5
chr03_7051	GSMUA_Achr8T09010_001	tetratricopeptide repeat domain containing protein, expressed	3.5
chr03_7051	GSMUA_Achr11T16040_001	Putative Receptor-like protein kinase ANXUR2	3.5
chr03_7051	GSMUA_Achr7T21400_001	disease resistance protein RGA2, putative, expressed	3.5
chr03_7051	GSMUA_Achr6T24320_001	Putative ZOS6-07 - C2H2 zinc finger protein, expressed	3.5
chr03_7051	GSMUA_Achr8T15710_001	Putative Disease resistance response protein 206	3.5
chr03_7051	GSMUA_Achr4T31030_001	Putative disease resistance protein RGA3	3.5
chr03_7051	GSMUA_Achr3T10380_001	expressed protein	3.5
chr03_7882	GSMUA_Achr1T08850_001	Putative Probable indole-3-acetic acid-amido synthetase GH3.5	3.5
chr03_7882	GSMUA_Achr11T26320_001	Metal transporter Nramp6	3.5
chr03_7882	GSMUA_AchrUn_randomT11650_001	Metal transporter Nramp6	3.5
chr03_7882	GSMUA_Achr1T17130_001	BZIP protein, putative, expressed	3.5
chr03_7882	GSMUA_Achr10T13870_001	SH3 domain containing protein, expressed	3.5
chr03_8720	GSMUA_Achr7T18690_001	1-phosphatidylinositol-4-phosphate 5-kinase/ zinc ion binding protein, putative, expressed	3.5
chr03_8720	GSMUA_Achr6T19560_001	Soluble inorganic pyrophosphatase	3.5
chr03_8720	GSMUA_AchrUn_randomT21000_001	harpin-induced protein 1 domain containing protein, expressed	3.5
chr03_8720	GSMUA_Achr3T23360_001	Putative NAC domain-containing protein 21/22	3.5
chr03_8720	GSMUA_Achr1T21920_001	Germin-like protein 3-1	3.5
chr03_8720	GSMUA_Achr4T15480_001	Hypothetical protein	3.5
chr03_8720	GSMUA_Achr2T21290_001	Putative expressed protein	3.5
chr03_8720	GSMUA_Achr5T06030_001	Putative uncharacterized protein	3.5
chr03_8720	GSMUA_Achr3T11130_001	anthranilate phosphoribosyltransferase, putative, expressed	3.5
chr03_8720	GSMUA_Achr4T32080_001	Hypothetical protein	3.5
chr03_8720	GSMUA_Achr9T27720_001	anthranilate phosphoribosyltransferase, putative, expressed	3.5
chr03_8720	GSMUA_Achr1T15930_001	Glycosyltransferase	3.5
chr03_8720	GSMUA_Achr7T26390_001	Putative Isoflavone 2'-hydroxylase	3.5
chr03_8720	GSMUA_Achr6T19360_001	Ser/Thr protein phosphatase family protein, putative, expressed	3.5
chr03_8720	GSMUA_Achr9T15380_001	Transcription factor HEC2	3.5
chr03_8720	GSMUA_Achr1T25160_001	Germin-like protein 5-1	3.5
chr03_8720	GSMUA_Achr2T03070_001	Hypothetical protein	3.5
chr03_8720	GSMUA_Achr8T19540_001	Putative expressed protein	3.5
chr03_8720	GSMUA_Achr5T17120_001	Cysteine synthase, chloroplastic/chromoplastic	3.5
chr03_8720	GSMUA_Achr3T24540_001	Putative uncharacterized protein Sb01g002560	3.5
chr03_8720	GSMUA_Achr3T25130_001	expressed protein	3.5
chr04_10750	GSMUA_Achr11T17020_001	Glycerol-3-phosphate dehydrogenase SDP6, mitochondrial	3.5
chr04_10750	GSMUA_Achr9T01050_001	phosphoglycerate mutase, putative, expressed	3.5
chr04_10750	GSMUA_Achr1T08700_001	NB-ARC/LRR disease resistance protein, putative, expressed	3.5
chr04_10750	GSMUA_Achr5T24090_001	UPF0136 membrane protein At2g26240	3.5
chr04_10750	GSMUA_Achr8T03640_001	Putative cysteine-rich receptor-like protein kinase 12	3.5
chr04_10750	GSMUA_Achr9T15600_001	U-box domain-containing protein 10	3.5
chr04_10750	GSMUA_Achr1T11980_001	Putative helix-loop-helix DNA-binding domain containing protein, expressed	3.5
chr04_10750	GSMUA_Achr5T18780_001	Putative expressed protein	3.5
chr04_11709	GSMUA_Achr10T11910_001	ANAC083 transcription factor	3.5
chr04_11709	GSMUA_Achr6T11890_001	expressed protein	3.5
chr04_11709	GSMUA_Achr3T11340_001	Putative WASH complex subunit 7 homolog	3.5
chr04_12269	GSMUA_Achr4T01370_001	Putative Target of rapamycin	3.5
chr04_12269	GSMUA_Achr8T21180_001	Anaphase-promoting complex subunit 1	3.5
chr04_12269	GSMUA_Achr6T07000_001	Vacuolar protein sorting-associated protein 55 homolog	3.5
chr04_12269	GSMUA_Achr6T04480_001	Hypothetical protein	3.5
chr04_12269	GSMUA_Achr3T31200_001	NLI interacting factor-like phosphatase, putative, expressed	3.5
chr04_12269	GSMUA_Achr1T18560_001	armadillo/beta-catenin repeat family protein, putative, expressed	3.5
chr04_12269	GSMUA_Achr9T16240_001	Pleiotropic drug resistance protein 12	3.5
chr04_12269	GSMUA_Achr4T12050_001	ABC transporter G family member 28	3.5
chr04_12269	GSMUA_AchrUn_randomT19350_001	Putative Kinesin-4	3.5
chr04_12269	GSMUA_Achr7T09490_001	Putative LRR receptor-like serine/threonine-protein kinase HSL2	3.5
chr04_12269	GSMUA_Achr3T28420_001	Actin-related protein 8	3.5
chr04_12269	GSMUA_AchrUn_randomT16520_001	Putative Probable LRR receptor-like serine/threonine-protein kinase At4g08850	3.5
chr04_12269	GSMUA_Achr7T25440_001	Putative Thioredoxin domain-containing protein 15	3.5
chr04_12305	GSMUA_Achr3T25650_001	Hypothetical protein	3.5
chr04_12305	GSMUA_Achr9T06960_001	Putative AdoMet-dependent rRNA methyltransferase spb1	3.5
chr04_12305	GSMUA_Achr4T04120_001	octicosapeptide/Phox/Bem1p, putative, expressed	3.5
chr04_12305	GSMUA_Achr10T02670_001	Putative protein kinase domain containing protein, expressed	3.5
chr04_12305	GSMUA_Achr1T18120_001	DUF630/DUF632 domains containing protein, putative, expressed	3.5
chr04_12305	GSMUA_Achr3T14690_001	DUF630/DUF632 domains containing protein, putative, expressed	3.5
chr04_12305	GSMUA_Achr3T01260_001	Putative expressed protein	3.5
chr04_9659	GSMUA_Achr1T17030_001	Monodehydroascorbate reductase	3.5
chr04_9659	GSMUA_Achr2T20300_001	Monodehydroascorbate reductase	3.5
chr04_9659	GSMUA_Achr3T31870_001	harpin-induced protein 1 domain containing protein, expressed	3.5
chr04_9659	GSMUA_Achr1T18940_001	Putative Protein GPR107	3.5
chr04_9659	GSMUA_Achr6T25610_001	glyoxal oxidase-related, putative	3.5
chr04_9659	GSMUA_Achr5T15890_001	auxin efflux carrier component, putative, expressed	3.5
chr04_9659	GSMUA_Achr10T15650_001	Uncharacterized protein At5g03900	3.5
chr04_9659	GSMUA_Achr2T12280_001	Probable S-acyltransferase At3g60800	3.5
chr04_9659	GSMUA_Achr7T06110_001	Putative Subtilisin-like protease	3.5
chr04_9659	GSMUA_Achr3T31180_001	60S acidic ribosomal protein P2B	3.5
chr04_9659	GSMUA_Achr6T15180_001	Protein phosphatase 2C 3	3.5
chr06_16110	GSMUA_Achr8T32080_001	Putative Protein terminal ear1	3.5
chr06_16110	GSMUA_Achr5T12830_001	Putative Naringenin,2-oxoglutarate 3-dioxygenase	3.5
chr06_16110	GSMUA_Achr3T13230_001	Putative uncharacterized protein	3.5
chr06_16110	GSMUA_Achr3T13230_001	Putative uncharacterized protein	3.5
chr06_16110	GSMUA_AchrUn_randomT24350_001	Hypothetical protein	3.5
chr06_16110	GSMUA_Achr1T19420_001	Transcription factor	3.5
chr06_16110	GSMUA_Achr3T14100_001	Putative conserved hypothetical protein	3.5
chr06_16110	GSMUA_Achr3T14190_001	Hypothetical protein	3.5
chr06_16110	GSMUA_Achr10T12700_001	Putative conserved hypothetical protein	3.5
chr06_18780	GSMUA_Achr3T30820_001	Hypothetical protein	3.5
chr06_18780	GSMUA_Achr5T06430_001	Putative expressed protein	3.5
chr06_18780	GSMUA_Achr11T15930_001	Cation/H(+) antiporter 19	3.5
chr06_18780	GSMUA_Achr2T13800_001	Putative expressed protein	3.5
chr06_18780	GSMUA_Achr3T23060_001	Putative Pentatricopeptide repeat-containing protein At5g50390, chloroplastic	3.5
chr06_18780	GSMUA_Achr8T20470_001	uncharacterized protein At4g06744 precursor, putative, expressed	3.5
chr07_21163	GSMUA_Achr9T23520_001	Putative zinc finger, C3HC4 type domain containing protein, expressed	3.5
chr07_21163	GSMUA_Achr9T27790_001	Putative Probably inactive leucine-rich repeat receptor-like protein kinase At5g06940	3.5
chr07_21163	GSMUA_Achr7T01270_001	Cullin-4	3.5
chr07_21163	GSMUA_Achr8T26350_001	Cytochrome P450 90B1	3.5
chr07_21163	GSMUA_Achr1T05830_001	Hypothetical protein	3.5
chr07_21163	GSMUA_Achr6T16630_001	nodulin, putative, expressed	3.5
chr07_21163	GSMUA_Achr6T36260_001	Putative Aspartic proteinase nepenthesin-2	3.5
chr07_21163	GSMUA_Achr11T23470_001	Putative Anaphase-promoting complex subunit cdc20	3.5
chr07_21163	GSMUA_Achr1T22100_001	Hypothetical protein	3.5
chr07_21163	GSMUA_Achr11T15820_001	AAA-type ATPase family protein, putative, expressed	3.5
chr07_21163	GSMUA_Achr10T30530_001	Aspartic proteinase-like protein 1	3.5
chr07_21163	GSMUA_Achr10T20240_001	Putative Uncharacterized GPI-anchored protein At4g28100	3.5
chr07_21163	GSMUA_Achr10T02270_001	tyrosine protein kinase domain containing protein, putative, expressed	3.5
chr08_22829	GSMUA_AchrUn_randomT08350_001	Transcription factor TCP20	3.5
chr08_24907	GSMUA_Achr7T24650_001	protein kinase family protein, putative, expressed	3.5
chr08_24907	GSMUA_Achr6T06340_001	Peptide transporter PTR2	3.5
chr08_24907	GSMUA_Achr3T08000_001	Putative Pentatricopeptide repeat-containing protein At2g06000	3.5
chr08_24907	GSMUA_Achr8T25080_001	protein kinase family protein, putative, expressed	3.5
chr08_24907	GSMUA_Achr9T27920_001	heavy metal transport/detoxification protein, putative	3.5
chr08_24907	GSMUA_Achr9T08110_001	Putative protease Do-like 14	3.5
chr09_27226	GSMUA_Achr8T07830_001	Hypothetical protein	3.5
chr09_27226	GSMUA_Achr3T03130_001	Putative Aspartic proteinase nepenthesin-2	3.5
chr09_27226	GSMUA_AchrUn_randomT29160_001	Putative LRR receptor-like serine/threonine-protein kinase ERL2	3.5
chr09_27226	GSMUA_Achr4T24590_001	Putative Phosphatidylserine decarboxylase proenzyme 1, mitochondrial	3.5
chr09_27226	GSMUA_Achr9T22180_001	Putative Probably inactive leucine-rich repeat receptor-like protein kinase At2g25790	3.5
chr09_27226	GSMUA_Achr3T28610_001	Putative Probably inactive leucine-rich repeat receptor-like protein kinase At2g25790	3.5
chr09_27226	GSMUA_AchrUn_randomT26610_001	Putative LRR receptor-like serine/threonine-protein kinase GSO1	3.5
chr09_27226	GSMUA_Achr9T22140_001	Putative Probable leucine-rich repeat receptor-like protein kinase At1g35710	3.5
chr09_27226	GSMUA_Achr3T28560_001	Putative LRR receptor-like serine/threonine-protein kinase GSO1	3.5
chr09_27226	GSMUA_Achr3T28790_001	Putative LRR receptor-like serine/threonine-protein kinase GSO1	3.5
chr09_27226	GSMUA_Achr9T22110_001	Putative LRR receptor-like serine/threonine-protein kinase GSO1	3.5
chr09_27226	GSMUA_Achr8T03820_001	Putative Protein STRUBBELIG-RECEPTOR FAMILY 1	3.5
chr09_27226	GSMUA_Achr7T20310_001	tetratricopeptide repeat domain containing protein, expressed	3.5
chr09_27226	GSMUA_Achr4T22810_001	Serine/threonine-protein phosphatase BSL3	3.5
chr09_27356	GSMUA_Achr8T24860_001	expressed protein	3.5
chr09_27356	GSMUA_Achr11T14130_001	Whole genome shotgun sequence of line PN40024, scaffold_60.assembly12x (Fragment)	3.5
chr09_27356	GSMUA_Achr1T04020_001	Putative Major facilitator superfamily domain-containing protein 5	3.5
chr09_27356	GSMUA_Achr1T09200_001	Putative Wall-associated receptor kinase 2	3.5
chr09_27356	GSMUA_Achr11T25870_001	Putative Solute carrier family 22 member 15-like	3.5
chr09_27356	GSMUA_Achr10T03510_001	Putative expressed protein	3.5
chr09_27356	GSMUA_Achr6T10270_001	zinc finger protein, putative, expressed	3.5
chr09_27356	GSMUA_AchrUn_randomT14680_001	expressed protein	3.5
chr09_27356	GSMUA_Achr4T00390_001	ABC transporter G family member 15	3.5
chr09_27356	GSMUA_Achr1T09220_001	Putative Wall-associated receptor kinase 3	3.5
chr09_28952	GSMUA_Achr2T11320_001	Putative NB-ARC domain containing protein, expressed	3.5
chr09_28952	GSMUA_Achr1T14020_001	Putative disease resistance protein RGA4	3.5
chr09_28952	GSMUA_Achr1T14030_001	Putative disease resistance protein RGA4	3.5
chr09_28952	GSMUA_Achr1T01400_001	Putative O-methyltransferase ZRP4	3.5
chr09_28952	GSMUA_Achr4T16570_001	Putative O-methyltransferase ZRP4	3.5
chr09_28952	GSMUA_AchrUn_randomT19870_001	Putative uncharacterized protein	3.5
chr09_28952	GSMUA_Achr11T15640_001	SH2 motif, putative, expressed	3.5
chr09_28952	GSMUA_AchrUn_randomT27810_001	Putative Disease resistance protein RGA2	3.5
chr09_28952	GSMUA_Achr3T27810_001	Putative disease resistance protein RGA1	3.5
chr10_29470	GSMUA_Achr9T30480_001	Whole genome shotgun sequence of line PN40024, scaffold_92.assembly12x (Fragment)	3.5
chr10_29470	GSMUA_Achr11T19420_001	Putative Pentatricopeptide repeat-containing protein At4g21065	3.5
chr10_29470	GSMUA_Achr5T24210_001	Putative 5'-nucleotidase domain-containing protein DDB_G0275467	3.5
chr10_29470	GSMUA_Achr4T15440_001	Isoflavone reductase homolog	3.5
chr10_29470	GSMUA_Achr3T04520_001	Putative Transmembrane 9 superfamily member 4	3.5
chr10_29470	GSMUA_Achr7T09310_001	Putative Graves disease carrier protein homolog	3.5
chr10_29470	GSMUA_Achr7T14320_001	Putative smr domain containing protein, expressed	3.5
chr10_29470	GSMUA_Achr11T05850_001	Putative expressed protein	3.5
chr10_29470	GSMUA_Achr3T29410_001	Putative glutamine amidotransferase-like protein RP404	3.5
chr10_29470	GSMUA_Achr1T22740_001	Whole genome shotgun sequence of line PN40024, scaffold_57.assembly12x (Fragment)	3.5
chr10_29470	GSMUA_AchrUn_randomT08400_001	Histidine kinase 2	3.5
chr10_29470	GSMUA_AchrUn_randomT08370_001	Histidine kinase 3	3.5
chr10_29470	GSMUA_Achr6T29570_001	CHR4/MI-2-LIKE, putative, expressed	3.5
chr10_29470	GSMUA_Achr2T02310_001	Putative Predicted protein	3.5
chr10_32282	GSMUA_Achr2T00960_001	Proteasome subunit beta type-1	3.5
chr10_32282	GSMUA_Achr4T07390_001	expressed protein	3.5
chr10_32282	GSMUA_Achr3T10810_001	Putative OsFBX323 - F-box domain containing protein, expressed	3.5
chr10_32282	GSMUA_Achr6T05340_001	Putative Subtilisin-like protease	3.5
chr10_32282	GSMUA_Achr3T17760_001	Hypothetical protein	3.5
chr10_32282	GSMUA_Achr3T17160_001	Serine/threonine-protein kinase AFC2	3.5
chr10_32282	GSMUA_Achr9T00500_001	Ser/Thr protein phosphatase family protein, putative, expressed	3.5
chr10_32282	GSMUA_Achr1T19990_001	expressed protein	3.5
chr10_32282	GSMUA_Achr9T21570_001	aberrant pollen transmission 1, putative, expressed	3.5
chr10_32282	GSMUA_AchrUn_randomT03010_001	Putative phosphoglycerate mutase DET1	3.5
chr10_32282	GSMUA_Achr2T04950_001	Xylem cysteine proteinase 1	3.5
chr10_32282	GSMUA_Achr3T03740_001	Xylem cysteine proteinase 1	3.5
chr10_32282	GSMUA_Achr10T09860_001	Aspartic proteinase Asp1	3.5
chr10_32282	GSMUA_Achr6T01980_001	NADP-dependent glyceraldehyde-3-phosphate dehydrogenase	3.5
chr10_32282	GSMUA_Achr10T20820_001	peptidyl-prolyl cis-trans isomerase-like 4, putative, expressed	3.5
chr10_32282	GSMUA_AchrUn_randomT01110_001	splicing factor, putative, expressed	3.5
chr10_32282	GSMUA_Achr9T28600_001	Putative Whole genome shotgun sequence of line PN40024, scaffold_179.assembly12x (Fragment)	3.5
chr10_32282	GSMUA_Achr1T20630_001	expressed protein	3.5
chr10_32282	GSMUA_Achr3T27100_001	Putative Phytosulfokine receptor 1	3.5
chr10_32282	GSMUA_Achr1T01770_001	AP-2 complex subunit alpha-2	3.5
chr10_32282	GSMUA_Achr9T16840_001	Putative expressed protein	3.5
chr10_32282	GSMUA_Achr11T21110_001	Hypothetical protein	3.5
chr10_32282	GSMUA_Achr10T05760_001	CBS domain-containing protein, putative, expressed	3.5
chr10_32282	GSMUA_Achr7T22980_001	CBS domain-containing protein, putative, expressed	3.5
chr10_32282	GSMUA_Achr8T21550_001	Putative Protein ETHYLENE INSENSITIVE 3	3.5
chr10_32282	GSMUA_Achr4T33640_001	Putative serine/threonine-protein kinase receptor	3.5
chr11_33768	GSMUA_Achr3T30560_001	Putative Cytokinin-O-glucosyltransferase 1	3.5
chr11_33768	GSMUA_Achr8T15510_001	Primary amine oxidase	3.5
chr11_33768	GSMUA_Achr5T21980_001	Putative uncharacterized protein	3.5
chr11_33768	GSMUA_Achr1T15980_001	retrotransposon protein, putative, unclassified, expressed	3.5
chr11_33768	GSMUA_Achr7T23380_001	Predicted protein	3.5
chr11_33768	GSMUA_Achr9T21310_001	heat shock protein-related, putative, expressed	3.5
chr11_33768	GSMUA_Achr9T16030_001	Putative expressed protein	3.5
mito6_37293	GSMUA_AchrUn_randomT15960_001	Putative expressed protein	3.5
mito6_37293	GSMUA_Achr8T13050_001	Hypothetical protein	3.5
mito6_37293	GSMUA_Achr6T25510_001	plant neutral invertase domain containing protein, expressed	3.5
mito6_37293	GSMUA_AchrUn_randomT08210_001	Putative Proton-coupled amino acid transporter 3	3.5
mito6_37293	GSMUA_Achr6T20260_001	Hypothetical protein	3.5
mito6_37293	GSMUA_Achr5T28950_001	Probable anion transporter 3, chloroplastic	3.5
mito6_37293	GSMUA_Achr11T20250_001	BTBA3 - Bric-a-Brac,Tramtrack, Broad Complex BTB domain with Ankyrin repeat region, expressed	3.5
mito6_37293	GSMUA_Achr7T21250_001	Putative Auxin-induced protein 5NG4	3.5
mito6_37293	GSMUA_Achr3T00450_001	Hypothetical protein	3.5
mito6_37293	GSMUA_Achr1T25920_001	exportin 1, putative, expressed	3.5
mito6_37293	GSMUA_Achr8T13370_001	UPF0548 protein At2g17695	3.5
mito6_37293	GSMUA_Achr11T09320_001	Putative Adipocyte plasma membrane-associated protein	3.5
mito6_37293	GSMUA_Achr9T13010_001	OsMADS63 - MADS-box family gene with MIKC* type-box, expressed	3.5
mito6_37293	GSMUA_Achr1T04980_001	Probable LRR receptor-like serine/threonine-protein kinase At1g53430	3.5
mito6_37293	GSMUA_Achr3T25170_001	protein kinase family protein, putative, expressed	3.5
mito6_37293	GSMUA_Achr6T02600_001	Glucomannan 4-beta-mannosyltransferase 9	3.5
mito6_37293	GSMUA_Achr8T28020_001	Hypothetical protein	3.5
mito6_37293	GSMUA_Achr10T13460_001	Hypothetical protein	3.5
mito6_37293	GSMUA_Achr6T15490_001	50S ribosomal protein L10, chloroplastic	3.5
mito6_37293	GSMUA_Achr8T05150_001	Hypothetical protein	3.5
mito6_37293	GSMUA_Achr4T12340_001	Protein TOPLESS	3.5
mito6_37293	GSMUA_Achr4T05650_001	Topless-related protein 1	3.5
mito6_37293	GSMUA_Achr6T28700_001	NIN, putative, expressed	3.5
mito6_37293	GSMUA_Achr1T15450_001	Protein TOPLESS	3.5
mito6_37293	GSMUA_Achr9T27200_001	Putative ABC transporter G family member 2	3.5
mito6_37293	GSMUA_Achr4T13360_001	STE_MEKK_ste11_MAP3K.8 - STE kinases include homologs to sterile 7, sterile 11 and sterile 20 from yeast, expressed	3.5
